# Supplementary material
Source: ML conference proceedings conference paper supplement (https://openaccess.thecvf.com/content/ICCV_2019/html/Tung_Similarity-Preserving_Knowledge_Distillation_ICCV_2019_paper.html)
Supplement: Supplementary file 1 [file Tung_Similarity-Preserving_Knowledge_Distillation_ICCV_2019_supplemental.pdf]

# Similarity-Preserving Knowledge Distillation: Supplementary Material

Frederick Tung<sup>1,2</sup> and Greg Mori<sup>1,2</sup>  
<sup>1</sup>Simon Fraser University    <sup>2</sup>Borealis AI  
 ftung@sfu.ca, mori@cs.sfu.ca

| Output size      | MobileNet- $k$                                                                                      |
|------------------|-----------------------------------------------------------------------------------------------------|
| $112 \times 112$ | $3 \times 3, 32k$                                                                                   |
| $112 \times 112$ | $3 \times 3$ dw, $32k$<br>$1 \times 1, 64k$                                                         |
| $56 \times 56$   | $3 \times 3$ dw, $64k$<br>$1 \times 1, 128k$                                                        |
| $56 \times 56$   | $3 \times 3$ dw, $128k$<br>$1 \times 1, 128k$                                                       |
| $28 \times 28$   | $3 \times 3$ dw, $128k$<br>$1 \times 1, 256k$                                                       |
| $28 \times 28$   | $3 \times 3$ dw, $256k$<br>$1 \times 1, 256k$                                                       |
| $14 \times 14$   | $3 \times 3$ dw, $256k$<br>$1 \times 1, 512k$                                                       |
| $14 \times 14$   | $\left. \begin{array}{l} 3 \times 3$ dw, $512k$ \\ $1 \times 1, 512k$ \end{array} \right\} \times 5 |
| $7 \times 7$     | $3 \times 3$ dw, $512k$<br>$1 \times 1, 1024k$                                                      |
| $7 \times 7$     | $3 \times 3$ dw, $1024k$<br>$1 \times 1, 1024k$                                                     |
| $1 \times 1$     | average pool, 47-d fc, softmax                                                                      |

Table 1. Structure of MobileNet networks used in transfer learning experiments. ‘dw’ denotes depthwise convolution. Downsampling is performed by strided  $3 \times 3$  depthwise convolutions.

| Output size      | MobileNetV2- $k$                       |
|------------------|----------------------------------------|
| $112 \times 112$ | $3 \times 3, 32k$                      |
| $112 \times 112$ | bottleneck( $t = 1, c = 16k, n = 1$ )  |
| $56 \times 56$   | bottleneck( $t = 6, c = 24k, n = 2$ )  |
| $28 \times 28$   | bottleneck( $t = 6, c = 32k, n = 3$ )  |
| $14 \times 14$   | bottleneck( $t = 6, c = 64k, n = 4$ )  |
| $14 \times 14$   | bottleneck( $t = 6, c = 96k, n = 3$ )  |
| $7 \times 7$     | bottleneck( $t = 6, c = 160k, n = 3$ ) |
| $7 \times 7$     | bottleneck( $t = 6, c = 320k, n = 1$ ) |
| $7 \times 7$     | $1 \times 1, 1280k$                    |
| $1 \times 1$     | average pool, 47-d fc, softmax         |

Table 2. Structure of MobileNetV2 networks used in transfer learning experiments. The notation ‘bottleneck( $t, c, n$ )’ denotes a group of bottleneck residual blocks with expansion factor  $t$ ,  $c$  output channels, and  $n$  repeated blocks. Downsampling is performed by strided  $3 \times 3$  depthwise convolution in the first block of a group.

| Output size    | ShuffleNetV2-0.5               | ShuffleNetV2-1.0          | ShuffleNetV2-2.0          |
|----------------|--------------------------------|---------------------------|---------------------------|
| $32 \times 32$ | $3 \times 3, 24$               | $3 \times 3, 24$          | $3 \times 3, 24$          |
| $16 \times 16$ | stage( $c = 48, n = 4$ )       | stage( $c = 116, n = 4$ ) | stage( $c = 244, n = 4$ ) |
| $8 \times 8$   | stage( $c = 96, n = 8$ )       | stage( $c = 232, n = 8$ ) | stage( $c = 488, n = 8$ ) |
| $4 \times 4$   | stage( $c = 192, n = 4$ )      | stage( $c = 464, n = 4$ ) | stage( $c = 976, n = 4$ ) |
| $4 \times 4$   | $1 \times 1, 1024$             | $1 \times 1, 1024$        | $1 \times 1, 2048$        |
| $1 \times 1$   | average pool, 10-d fc, softmax |                           |                           |

Table 3. Structure of ShuffleNetV2 networks used in CINIC-10 experiments. The notation ‘stage( $c, n$ )’ denotes a group of ShuffleNetV2 building blocks with  $c$  output channels and  $n$  repeated blocks. Downsampling is performed by strided  $3 \times 3$  depthwise convolutions in the first block of a group.
